# Supplementary material for: SMAP2 Regulates Retrograde Transport from Recycling Endosomes to the Golgi
Source: PubMed Central journal article supplement (PMC3704519; doi:10.1371/journal.pone.0069145), 2013-07-08

Figure S3

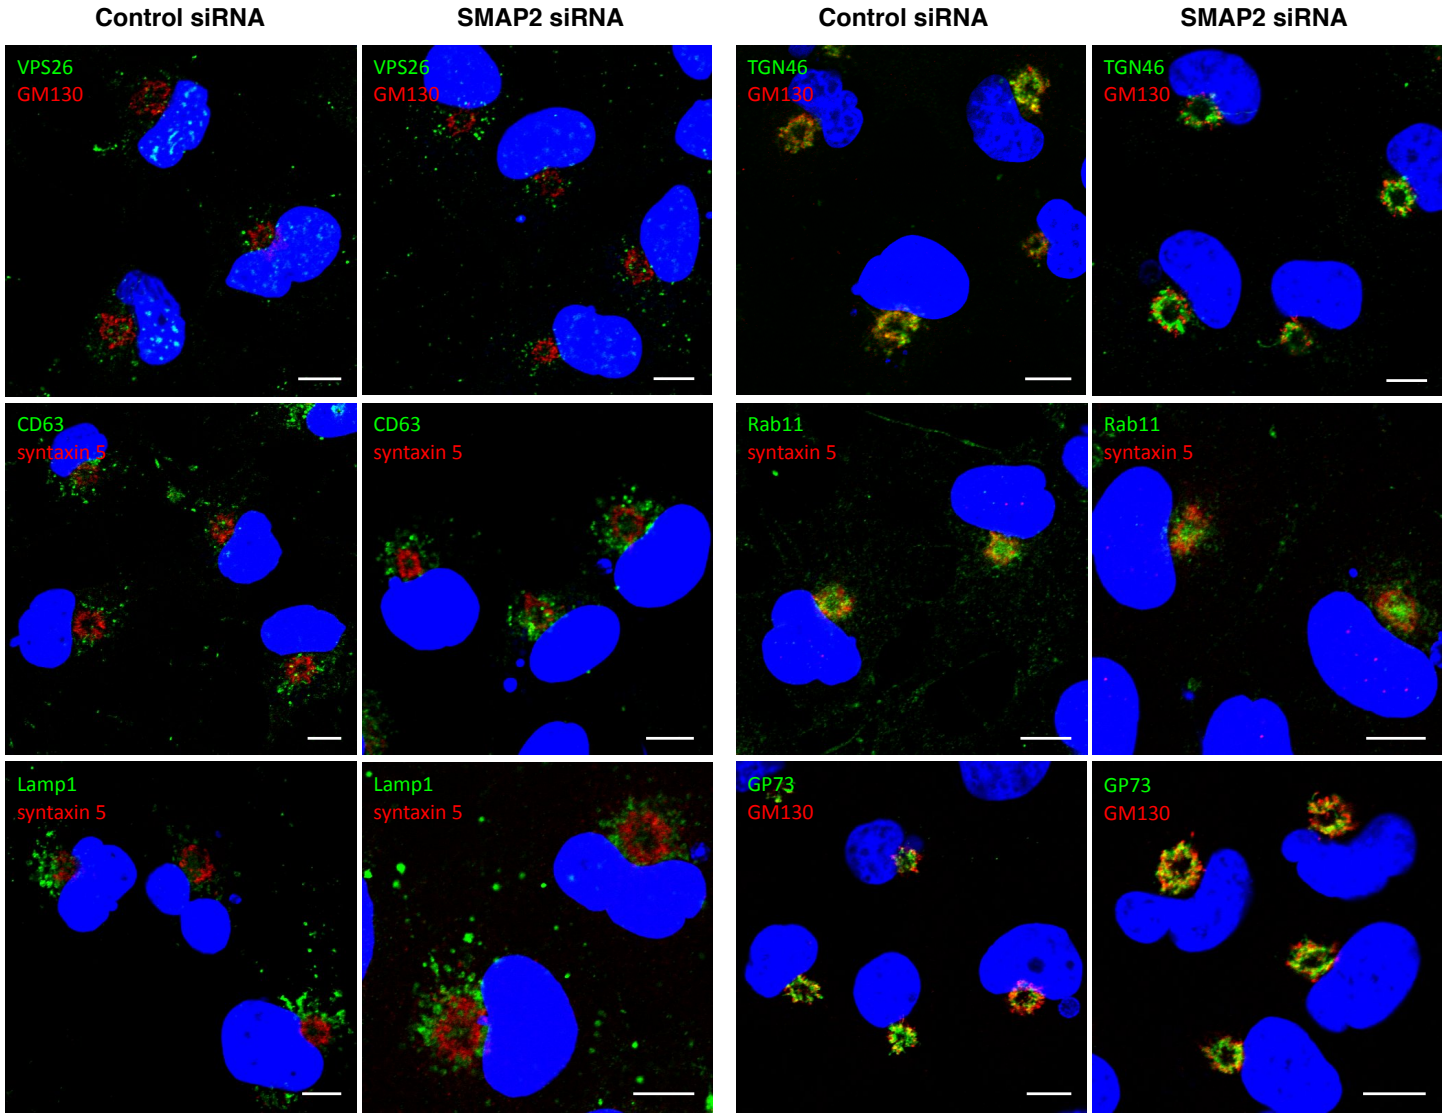

Supplement: pone.0069145.s003.pdf [file pone.0069145.s003.pdf]
